# Supplementary material for: Self-assembled hierarchical metal–polyphenol-coordinated hybrid 2D Co–CTA@g-C3N4heterostructured nanosheets for efficient electrocatalytic oxygen reduction
Source: Royal Society of Chemistry journal article supplement (doi:10.1039/d2cy00348a), 2022-01-01
Supplement: d2cy00348a1.pdf [file d2cy00348a1.pdf]

## Supplementary Figures and Tables

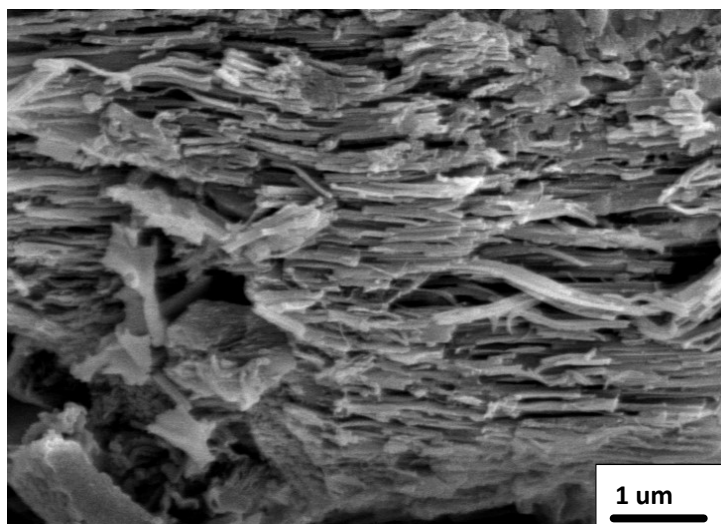

**Fig. S1.** SEM image of as-prepared hierarchical porous 2D ultrathin  $g\text{-C}_3\text{N}_4$  nanosheets.

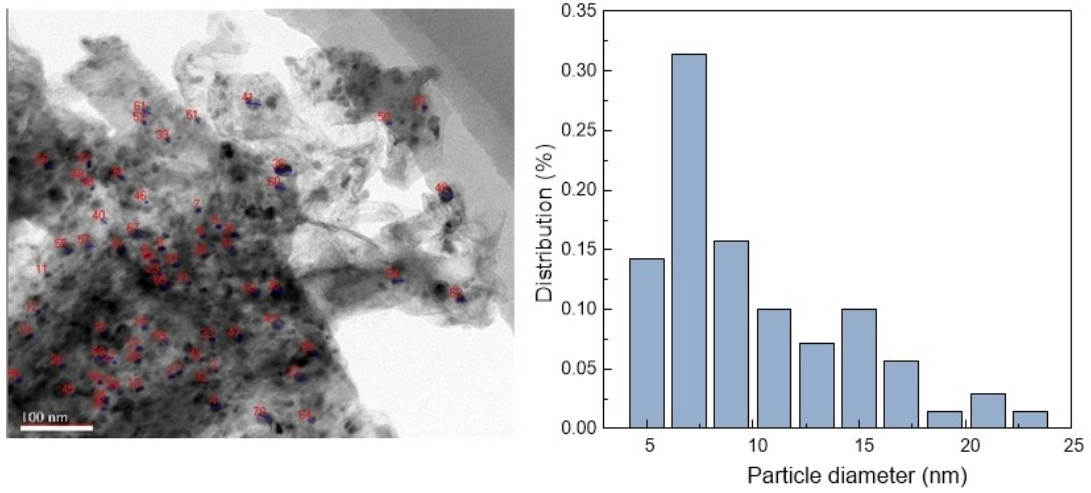

**Fig. S2.** Particle size analysis and distribution of the TEM images of the hierarchical porous  $\text{Co}_{2.5}\text{-C}_{\text{TA1}}@g\text{-C}_3\text{N}_4\text{-700}^\circ\text{C}$  nanosheets by using a semiautomated sizing approach. Scale bars, 100 nm.

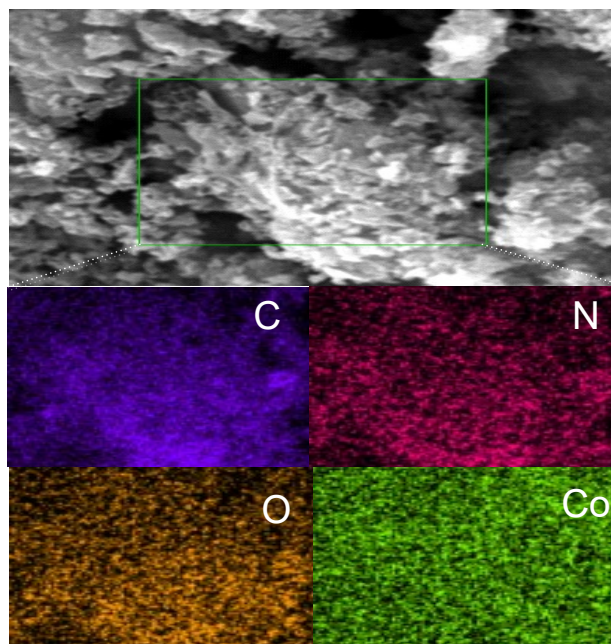

**Fig. S3.** EDX mapping of the  $\text{Co}_{2.5}\text{-C}_{\text{TAI}}@\text{g-C}_3\text{N}_4\text{-700}^\circ\text{C}$  graphite-carbon hybrid heterostructured nanosheets. Scale bars, 5  $\mu\text{m}$ .

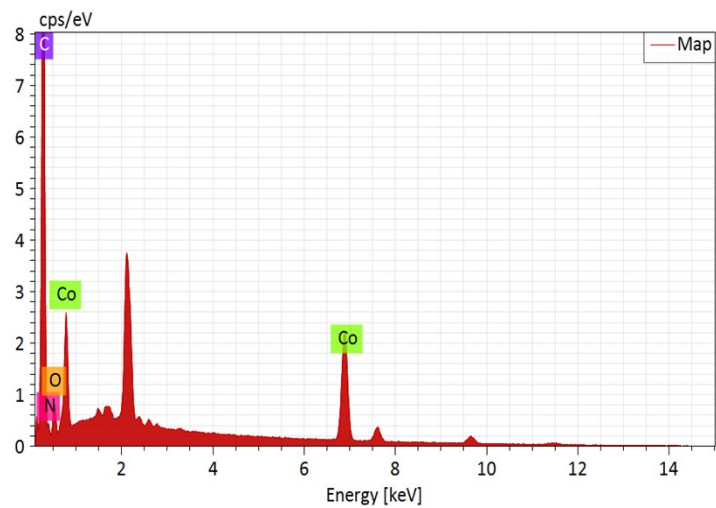

**Fig. S4.** The elemental analysis spectrum from EDX mapping of the hierarchical porous  $\text{Co}_{2.5}\text{-C}_{\text{TA1}}\text{@g-C}_3\text{N}_4$  graphite-carbon hybrid nanosheets calcinated at  $700^\circ\text{C}$ .

**Table S1** The elemental content analysis of the hierarchical porous Co<sub>2.5</sub>-C<sub>TAl</sub>@g-C<sub>3</sub>N<sub>4</sub> nanosheets calcinated at 700°C by EDX characterization.

| Element | Atomic number | Normalized atomic mass (%) |
|---------|---------------|----------------------------|
| C       | 6             | 73.60                      |
| Co      | 27            | 8.22                       |
| O       | 8             | 5.00                       |
| N       | 7             | 11.20                      |
| Au      | 79            | 1.98                       |

**Table S2** The BET results of hierarchical porous  $\text{Co}_{2.5}\text{-C}_{\text{TAl}}@\text{g-C}_3\text{N}_4\text{-700}^\circ\text{C}$  nanosheets

| Sample                                                                                  | Specific surface area ( $\text{cm}^2 \text{g}^{-1}$ ) | Pore volume ( $\text{cm}^3 \text{g}^{-1}$ ) |
|-----------------------------------------------------------------------------------------|-------------------------------------------------------|---------------------------------------------|
| $\text{Co}_{2.5}\text{-C}_{\text{TAl}}@\text{g-C}_3\text{N}_4\text{-700}^\circ\text{C}$ | 335.9                                                 | 0.858                                       |

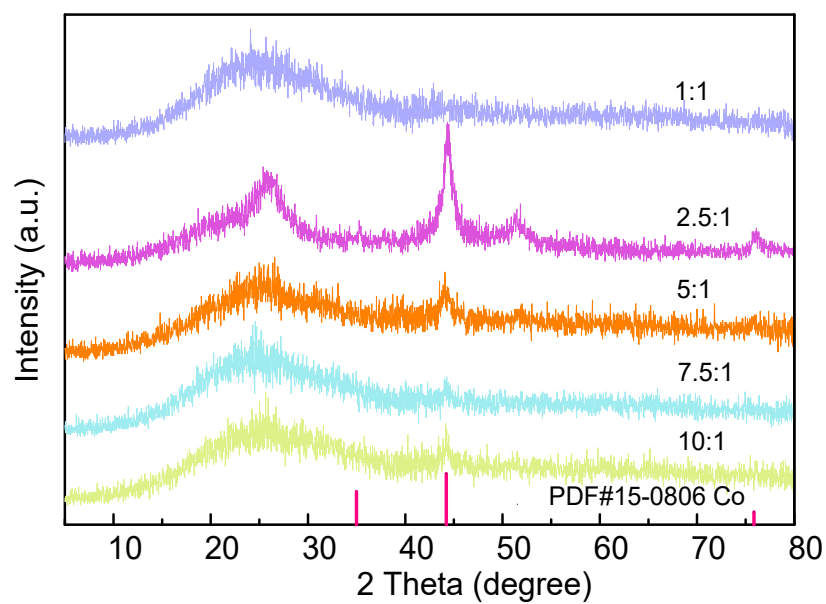

**Fig. S5.** XRD patterns of the hierarchical porous Co-C<sub>TA</sub>@g-C<sub>3</sub>N<sub>4</sub> nanosheets prepared with different ratios of Co/TA calcinated at 700°C.

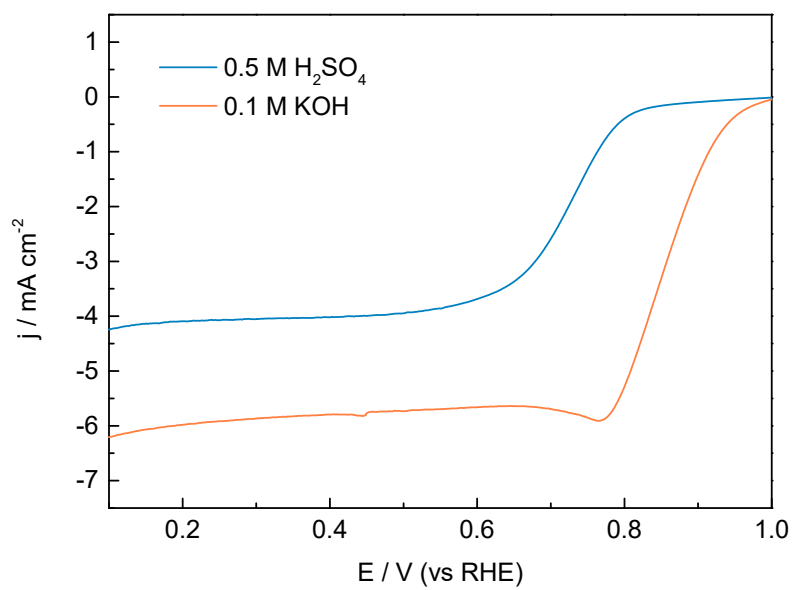

**Fig. S6.** LSV curves of  $\text{Co}_{2.5}\text{-C}_{\text{TA1}}@\text{g-C}_3\text{N}_4\text{-700}^\circ\text{C}$  for ORR in 0.5 M  $\text{H}_2\text{SO}_4$  and 0.1 M KOH solutions.



**Table S3** Comparison of electrochemical properties of Pt/C, Co<sub>2.5</sub>-C<sub>TAl</sub>@g-C<sub>3</sub>N<sub>4</sub>-700°C nanosheets in alkaline and acidic electrolytes.

| Samples                                                                                                                | E <sub>Onset</sub><br>E (V vs.<br>RHE) | E <sub>1/2</sub><br>E (V vs.<br>RHE) | Limiting current<br>density<br>J (mA cm <sup>-2</sup> ) |
|------------------------------------------------------------------------------------------------------------------------|----------------------------------------|--------------------------------------|---------------------------------------------------------|
| Co <sub>2.5</sub> -C <sub>TAl</sub> @g-C <sub>3</sub> N <sub>4</sub> -700°C<br>(0.1 M KOH)                             | 0.990                                  | 0.864                                | -6.3                                                    |
| Co <sub>2.5</sub> -C <sub>TAl</sub> @g-C <sub>3</sub> N <sub>4</sub> -700°C<br>(0.5 M H <sub>2</sub> SO <sub>4</sub> ) | 0.912                                  | 0.735                                | -4.2                                                    |
| 20% Pt/C<br>(0.1 M KOH)                                                                                                | 0.994                                  | 0.878                                | -5.1                                                    |

**Table S4** Electrochemical performance comparison of the hierarchical porous Co- $C_{TA}@g-C_3N_4$  nanosheet prepared with different ratios of Co/TA calcinated at 700°C.

| Samples                                       | $E_{Onset}$<br>E (V vs.<br>RHE) | $E_{1/2}$<br>E (V vs.<br>RHE) | Limiting current<br>density<br>J ( $mA\ cm^{-2}$ ) |
|-----------------------------------------------|---------------------------------|-------------------------------|----------------------------------------------------|
| Co@g- $C_3N_4$ -700°C                         | 0.826                           | 0.598                         | -2.2                                               |
| $C_{TA}@g-C_3N_4$ -700°C                      | 0.724                           | 0.613                         | -3.5                                               |
| Co <sub>1</sub> - $C_{TA1}@g-C_3N_4$ -700°C   | 0.875                           | 0.715                         | -2.7                                               |
| Co <sub>2.5</sub> - $C_{TA1}@g-C_3N_4$ -700°C | 0.990                           | 0.864                         | -6.3                                               |
| Co <sub>5</sub> - $C_{TA1}@g-C_3N_4$ -700°C   | 0.989                           | 0.861                         | -5.7                                               |
| Co <sub>7.5</sub> - $C_{TA1}@g-C_3N_4$ -700°C | 0.980                           | 0.871                         | -4.1                                               |
| Co <sub>10</sub> - $C_{TA1}@g-C_3N_4$ -700°C  | 0.975                           | 0.865                         | -4.2                                               |
| 20% Pt/C                                      | 0.994                           | 0.878                         | -5.1                                               |
